# Supplementary material for: Thorough molecular configuration analysis of noncanonical AAV genomes in AAV vector preparations
Source: PubMed Central journal article supplement — Mol Ther Methods Clin Dev. 2024 Feb 19;32(1):101215. doi: 10.1016/j.omtm.2024.101215 (PMC10924063; doi:10.1016/j.omtm.2024.101215), 2024-02-19
Supplement: mmc1.pdf [file mmc1.pdf]

**OMTM, Volume 32**

**Supplemental information**

**Thorough molecular configuration analysis  
of noncanonical AAV genomes in AAV vector  
preparations**

**Junping Zhang, Xiangping Yu, Matthew Chrzanowski, Jiahe Tian, Derek Pouchnik, Ping Guo, Roland W. Herzog, and Weidong Xiao**

## Supplemental Material

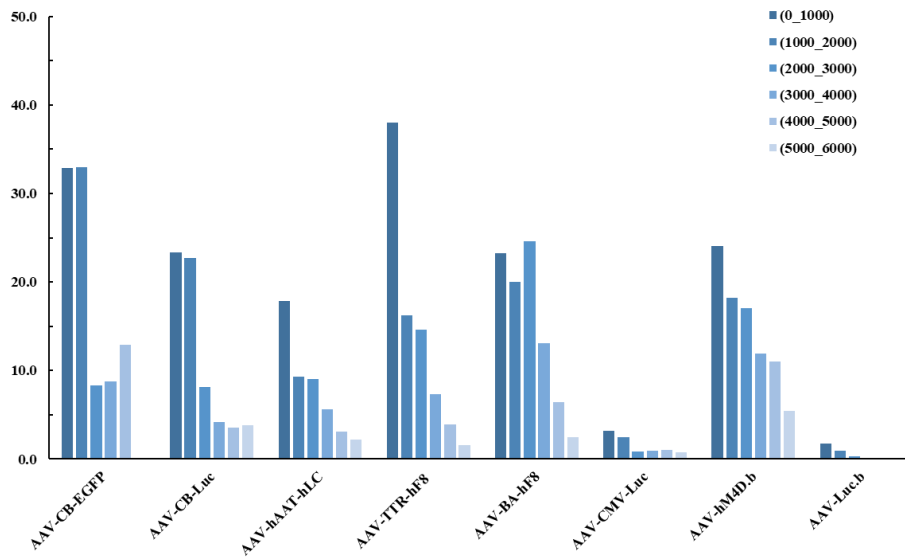

**Figure S1. SBG configuration ratio of varying size range in the rAAV populations.** The Minimap2 aligned reads are subsampled by size subset filtering setting in the range between 0 and 6kb.

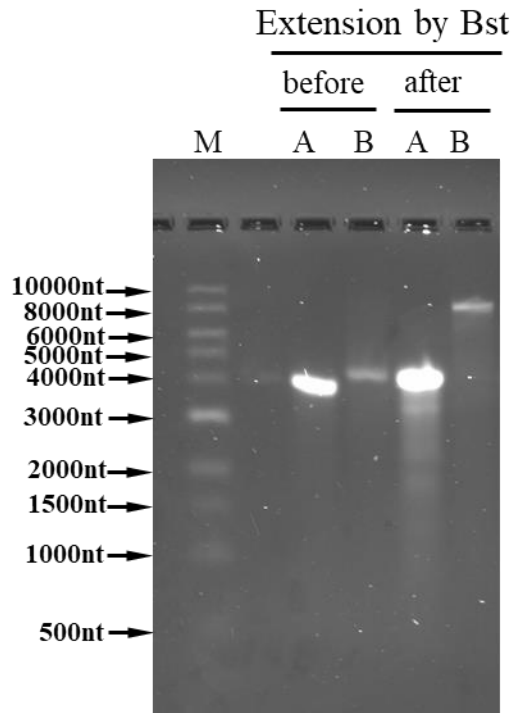

**Figure S2 Assessment of AAV genome extension products by Alkaline gel electrophoresis.**

The vector DNA was extracted and extended using Bst2.0 polymerase at 50°C for 1 hour. The resulting extension products were subjected to alkaline gel electrophoresis to evaluate extension efficiency. (A) For scAAV-CMV-GFP, the vector genome size remained unchanged before and after extension. (B) In the case of ssAAV-CMV-GFP, the vector genome size doubled before and after extension. M: Marker.
